# Supplementary material for: Tumor-on-a-chip: a microfluidic model to study cell response to environmental gradients
Source: Royal Society of Chemistry journal article supplement (doi:10.1039/c9lc00270g), 2019-01-01
Supplement: c9lc00270g1.pdf [file c9lc00270g1.pdf]

## Supporting information

### Cell-glucose gradients simulation with reaction-diffusion equations

To simulate the cell and glucose gradients throughout the chip, we propose a model of reaction-diffusion equations on a 1-dimensional spatial domain. This domain represents a linear section of the microfluidic chip. All simulations were performed with Matlab (R2014b version), using the pdepe package. In the equations, we define the cell density ( $u_1$ ) and the glucose concentration ( $u_2$ ). The equations reflect glucose consumption by the cells, and also the three states of behavior of the cells depending on the levels of glucose: growth, quiescence, and death.

The equations are as follows:

$$\frac{\partial u_1}{\partial t} = D_1 \frac{\partial^2 u_1}{\partial x^2} + \gamma(u_1, u_2) \quad (1)$$

$$\frac{\partial u_2}{\partial t} = D_2 \frac{\partial^2 u_2}{\partial x^2} - \beta \cdot u_1 \cdot u_2 \quad (2)$$

Initial conditions reflect the initial setting of the microfluidic chip, in which there is a constant concentration of glucose in the whole channel, and a constant density of cells in the whole channel except within the blood vessel. These conditions are reflected as follows:

$$u_1(0, x) = \begin{cases} u_1^0 & \text{if } x \in (L_1, L_{bv1}) \cup (L_{bv2}, L_2) \\ 0 & \text{otherwise} \end{cases} \quad (3)$$

$$u_2(0, x) = \begin{cases} u_2^0 & \text{if } x \in (L_1, L_2) \\ 0 & \text{otherwise} \end{cases} \quad (4)$$

To consider the two scenarios of interest (i.e., presence and absence of diffusion ports), we use two different sets of boundary conditions. Cells are always considered to be unable to cross the boundaries of the microdevice. The right boundary is also considered always to be closed to glucose penetration.

For the first simulation (absence of diffusion ports), the boundary conditions are defined simply as:

$$\frac{\partial u_1}{\partial x}(0,t) = \frac{\partial u_1}{\partial x}(L,t) = \frac{\partial u_2}{\partial x}(0,t) = \frac{\partial u_2}{\partial x}(L,t) = 0 \quad (5)$$

For the second scenario (presence of diffusion ports), we consider a mixed boundary condition that reflects the capacity of glucose to penetrate through the port. This is reflected in the equations as follows:

$$\frac{\partial u_1}{\partial x}(0,t) = \frac{\partial u_1}{\partial x}(L,t) = \frac{\partial u_2}{\partial x}(0,t) = 0 \quad (6)$$

$$\frac{\partial u_2}{\partial x}(L,t) + u_2^L = 0 \quad (7)$$

In the boundary conditions described above, the  $u_2^L$  term reflects the concentration of glucose outside the chip, that crosses through the port to create the expected gradient.

In equation (1), the term  $\gamma(u_1, u_2)$  reflects the three scenarios to which cells may be subject: growth, quiescence, and death. This function is defined by parts, and responds to the following expression:

$$\gamma(u_1, u_2) = \begin{cases} \alpha u_1 & \text{if } u_2 > \gamma_{growth} \\ 0 & \text{if } u_2 \in [\gamma_{quiesc}, \gamma_{growth}) \\ -\delta \cdot u_1 \cdot u_2 & \text{if } u_2 < \gamma_{quiesc} \end{cases} \quad (8)$$

In the equations above, the symbols stand for the following meanings:

$u_1(x,t)$  - Cell population (cancer cells) along the 1-dimensional channel.

$u_2(x,t)$  - Glucose concentration along the 1-dimensional channel.

$D_1(x)$  - Cell diffusion rate.

$D_2(x)$  - Drug diffusion rate.

$\alpha$  - Cell replication rate (number of cell divisions per unit time).

$\beta$  - Glucose consumption rate

$\delta$  - Cell death rate (in absence of glucose).

$\gamma_{growth}$  - Glucose concentration threshold for cells to be in growth state.

$\gamma_{quiesc}$  - Glucose concentration threshold for cells to be in quiescent state.

**Table 1**

| Symbol    | Meaning                                        | Value | Source                                                                                                                                                                               |
|-----------|------------------------------------------------|-------|--------------------------------------------------------------------------------------------------------------------------------------------------------------------------------------|
| $u_1^0$   | Initial cell concentration (100.000 cells/u m) | 1     | Initial experimental conditions                                                                                                                                                      |
| $u_2^0$   | Initial glucose concentration (per unit space) | 50    | Initial experimental conditions                                                                                                                                                      |
| $D_1$     | Cell diffusion rate inside lumen (um/h)        | 0.001 | Fitted to experimental results                                                                                                                                                       |
| $D_2$     | Glucose diffusion rate inside lumen (um/h)     | 8.9   | $\lambda\text{m/s}$<br>[ <a href="https://bionumbers.hms.harvard.edu/bionumber.aspx?id=104089&amp;ver=7">https://bionumbers.hms.harvard.edu/bionumber.aspx?id=104089&amp;ver=7</a> ] |
| $\alpha$  | Cell replication rate                          | 0.05  | As in [36]                                                                                                                                                                           |
| $\beta$   | Glucose consumption rate                       | 0.8   | Fitted to experimental results                                                                                                                                                       |
| $\delta$  | Cell death rate in absence of glucose          | 0.05  | Fitted to experimental results                                                                                                                                                       |
| $L_{bv1}$ | Blood-vessel (left side)                       | 1/9   | Initial experimental conditions                                                                                                                                                      |
| $L_{bv2}$ | Blood-vessel (right side)                      | 2/9   | Initial experimental conditions                                                                                                                                                      |

**Table S1. Parameters used in the computational simulation.**

Due to the absence of data on the concentration of glucose that induces quiescence and cell death, we adjusted these numbers to the behavior observed experimentally, in order to better reproduce cell behavior. To obtain simulation over time of the system described above, equations were solved numerically, with help of a finite difference method. The 24-hour time interval was divided into 150 time-steps. The 10  $\mu\text{m}$  length space region was divided into 1000 small regions.

A Microdevice without diffusion ports

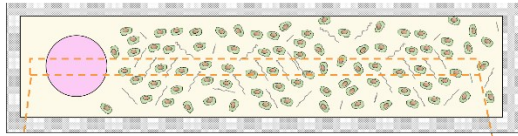

B

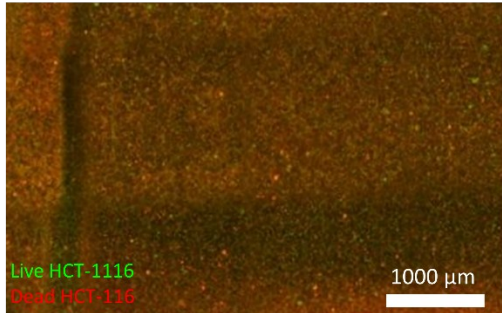

C

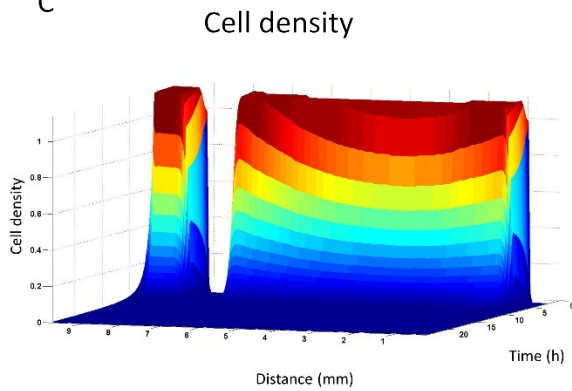

D

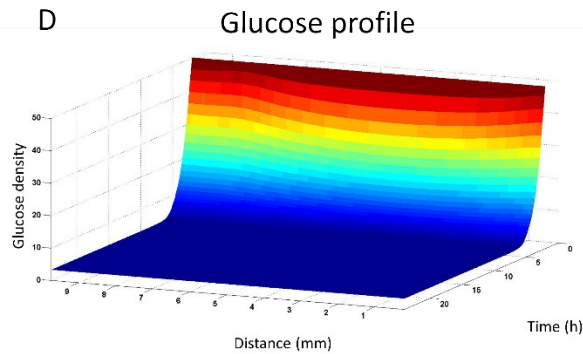

E Microdevice with diffusion ports

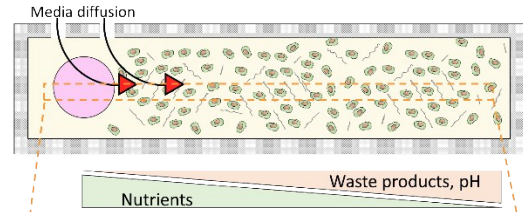

F

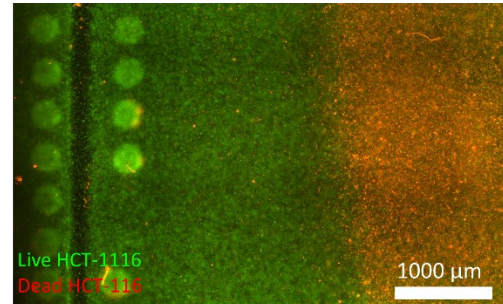

G

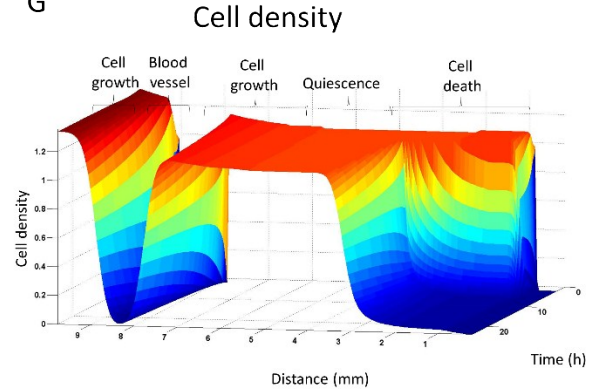

H

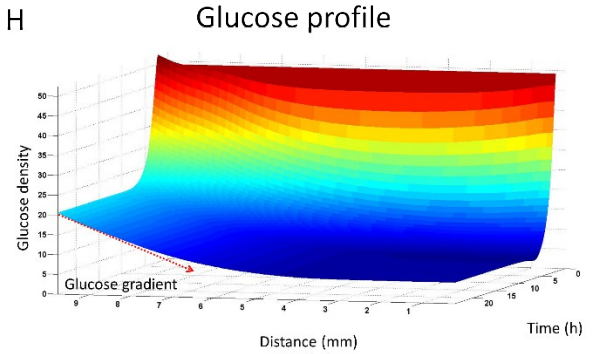

Supporting figure 1. Effect of diffusion ports. A) Scheme showing the initial design. The absence of diffusion ports on the top of the microdevice limited media diffusion inside the microdevice. B) Fluorescence microscopy image showing the intense necrosis in the absence of ports across the hydrogel. C-D) Computational simulation of the cell density and glucose profile across the hydrogel in the absence of diffusion ports. E) Scheme showing a microdevice including diffusion ports, which allowed media diffusion into the chamber. F) Fluorescence microscopy image showing the effect

of diffusion ports on cell viability. Media diffusion into the chamber led to the generation of two different regions, characterized by high cell viability and mortality respectively. G-H) Computational simulation of the cell density and glucose profile across the hydrogel in the presence of diffusion ports. The simulation shows the proliferative, quiescent, and necrotic area.

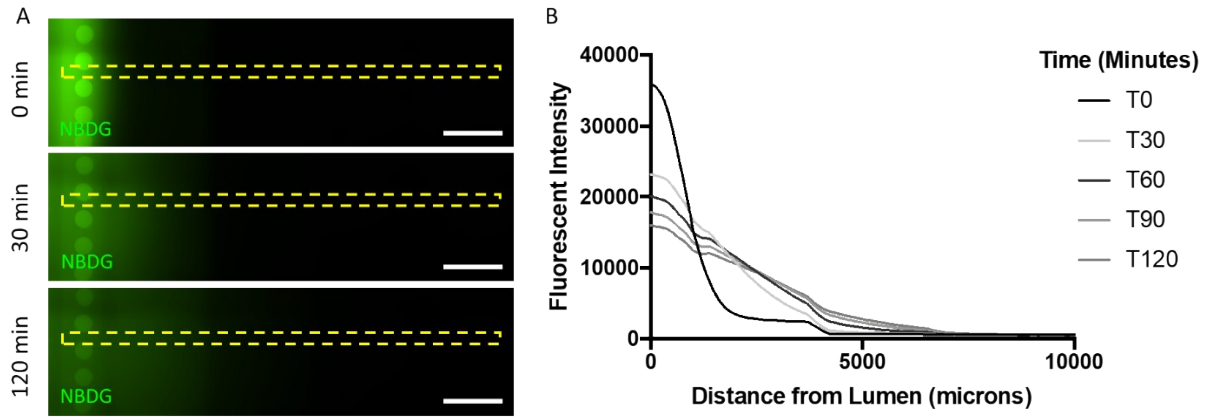

**Supporting Figure 2. NBDG diffusion profile in the microdevice.** A) The fluorescent glucose analog NBDG was dissolved in PBS at 200  $\mu$ M and perfused through the central lumen. The NBDG diffusion profile across the collagen hydrogel was evaluated at different times. B) The graph shows the NBDG fluorescence profile across the yellow region. Given the large dimensions of the chamber (i.e., 1.5 cm length x 1.0 cm width), NBDG required a long time to reach the furthest regions from the lumen.

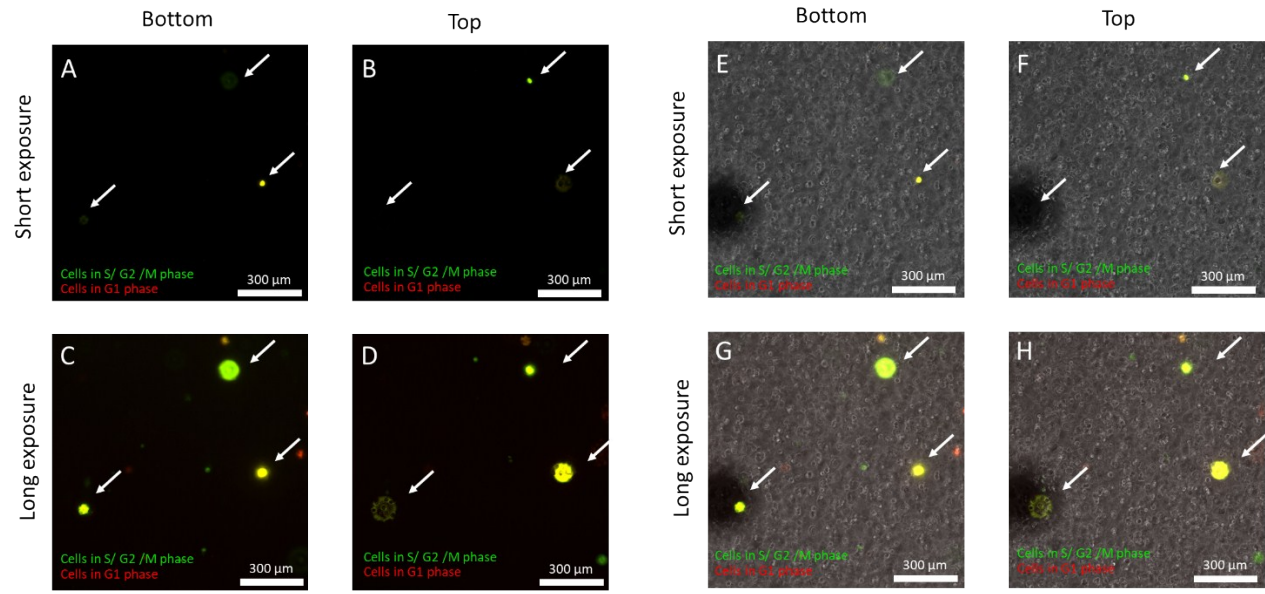

**Supporting Figure 3. HCT-116 cells transfected with the FUCCI cell cycle sensor.** A-B) Transfected cells were embedded in the hydrogel with non-transfected cells and Z-stacks were acquired using a short exposure time (50 ms). Images show the bottom (A) and top (B) of the stack. C-D) Same field of view acquired using long exposure (1000 ms). The images show a larger number of transfected cells and the brightest cells appear as larger spots. E-H) Same field of view showing the fluorescence images overlaid with the brightfield image.



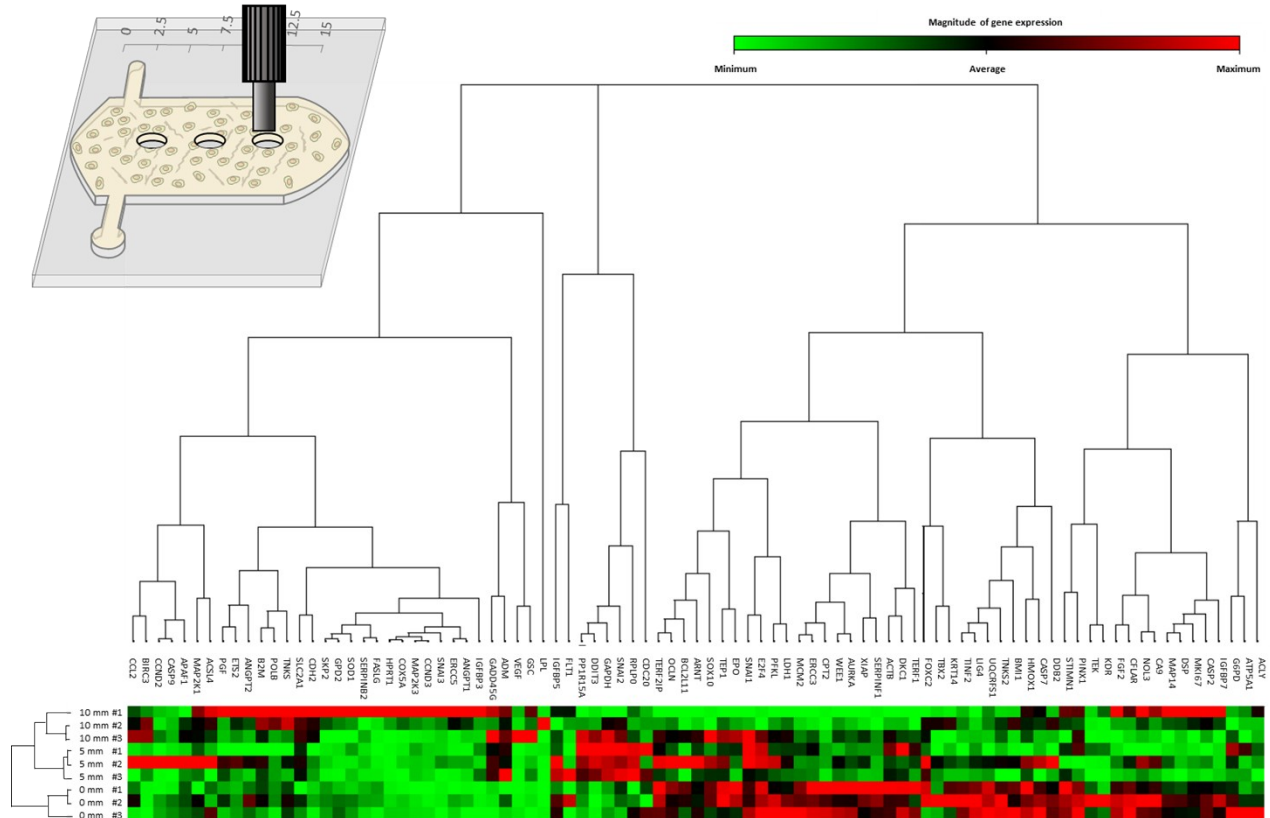

**Supporting Figure 4. Gene profile analysis.** HCT-116 cells were cultured at 5 million cells/ml in the microdevice. After 24 hours in culture, cells were isolated using a biopsy punch (1mm diameter) at different distances from the lumen (i.e., 0, 5 and 10 mm). The expression of ninety genes related with multiple pathways was analyzed and presented in a heat-map showing non-supervised hierarchical clustering of co-regulated genes.

| Table 2 |                                                                    |                                                                                                                                                                                                            |                          |
|---------|--------------------------------------------------------------------|------------------------------------------------------------------------------------------------------------------------------------------------------------------------------------------------------------|--------------------------|
| Gene    | Full name                                                          | Function                                                                                                                                                                                                   | State at 10mm from lumen |
| IGFBP3  | Insulin-like growth factor-binding protein 3                       | Binds to insulin-like growth factors (IGFs). In tissues, IGBP3 blocks IGF access to its receptor, decreasing cell proliferation.                                                                           | Upregulated              |
| GADD45G | Growth arrest and DNA damage inducible gamma                       | Involved in DNA repair and is upregulated after cellular stress.                                                                                                                                           | Upregulated              |
| BIRC3   | Baculoviral IAP repeat containing 3                                | Apoptosis inhibition by binding to tumor necrosis factor-associated factors (TRAFs). BIRC3 blocks apoptosis due to deprivation of serum and growth factors.                                                | Upregulated              |
| ADM     | Adrenomedullin                                                     | ADM induces angiogenesis, vasodilatation, and ROS resistance.                                                                                                                                              | Upregulated              |
| PINX1   | PIN2 (TERF1) interacting telomerase inhibitor 1                    | Involved in telomere stability. PINX1 inhibits telomerase activity, therefore leading to telomere shortening and decrease genome stability and cell proliferation.                                         | Downregulated            |
| STMN1   | Stathmin 1                                                         | Regulates cytoskeleton stability by promoting microtubule depolymerization.                                                                                                                                | Downregulated            |
| FGF2    | Fibroblast growth factor 2                                         | Induces cell proliferation and angiogenesis.                                                                                                                                                               | Downregulated            |
| DKC1    | Dyskerin pseudouridine synthase 1                                  | Stabilizes the telomerase complex therefore enabling continuous self-renewal.                                                                                                                              | Downregulated            |
| BMI1    | BMI1 proto-oncogene                                                | Indispensable for self-renewal on both normal and cancer cells. Also involved in radiation-induced DNA damage repair. BMI1 absence leads to increase sensitivity to radiotherapy and double strand breaks. | Downregulated            |
| UQCRCF1 | Ubiquinol-cytochrome C reductase, rieske iron-sulfur polypeptide 1 | Subunit of the complex III in the mitochondrial respiratory chain. It has been linked to increase in cancer aggressiveness.                                                                                | Downregulated            |
| TINF2   | TERF1 interacting nuclear factor 2                                 | Encodes a protein of the shelterin, a protein complex that protect the telomere from DNA damage.                                                                                                           | Downregulated            |
| DDB2    | DNA damage-binding protein 2                                       | DDB2 dimerizes with DDB1 in order to form the UV-damaged DNA-binding protein complex (the UV-DDB complex), which repairs UV-induced DNA damage.                                                            | Downregulated            |
| TNKS2   | Tankyrase-2                                                        | Involved in Wnt pathway, vesicle trafficking and telomere length and stability.                                                                                                                            | Downregulated            |
| MCM2    | Minichromosome maintenance complex component 2                     | Necessary for the initiation of cell replication.                                                                                                                                                          | Downregulated            |
| WEE1    | WEE1 G2 checkpoint kinase                                          | Mitotic checkpoint. WEE1 prevents cells to entry in mitosis during substrate competition or DNA damage.                                                                                                    | Downregulated            |
| ERCC3   | ERCC excision Repair 3, TFIIH core complex helicase subunit        | Repairs DNA damage generated by radiation.                                                                                                                                                                 | Downregulated            |
| XIAP    | X-linked inhibitor of apoptosis protein                            | Inhibitor of caspase 3, 7 and 9, blocking caspase-mediated apoptosis.                                                                                                                                      | Downregulated            |
| AURKA   | Aurora A kinase                                                    | Essential during cell mitosis in the regulation of chromosomal segregation. Upregulated in proliferating cells like cancer cells.                                                                          | Downregulated            |
| LIG4    | DNA ligase 4                                                       | Necessary for the repair of double-strand DNA breaks                                                                                                                                                       | Downregulated            |
| CPT2    | carnitine palmitoyl transferase 2                                  | Involved in fatty acid oxidation in the mitochondria.                                                                                                                                                      | Downregulated            |

**Table S2. Gene expression.** List of genes that showed significant changes between the punches extracted at 0 mm and the 10 mm punch.
